# Supplementary material
Source: publisher figshare collection journal article supplement (https://karger.figshare.com/ndownloader/files/23522819)
Supplement: Supplementary file 1 [file 23522819]

Supplementary Table 1

A full panel of coagulation factors including all coding sequence and exonic boundaries ±10 base pairs (bp) of 68 relevant genes.

PMID: 27084890

| *ABCG5* | *ABCG8* | *ACVRL1* | *ANKRD26* | *AP3B1* | *BLOC1S3* | *CYCS* | *DTNBP1* | *ENG* | *F10* |
| --- | --- | --- | --- | --- | --- | --- | --- | --- | --- |
| *F11* | *F13A1* | *F13B* | *F2* | *F5* | *F7* | *F8* | *F9* | *FGA* | *FGB* |
| *FGG* | *FLI1* | *FLNA* | *GATA1* | *GGCX* | *GP1BA* | *GP1BB* | *GP6* | *GP9* | *HOXA11* |
| *HPS1* | *HPS3* | *HPS4* | *HPS5* | *HPS6* | *HRG* | *ITGA2B* | *ITGB3* | *JAK2* | *KLKB1* |
| *KNG1* | *LMAN1* | *LYST* | *MCFD2* | *MPL* | *MYH9* | *NBEA* | *NBEAL2* | *P2RY12* | *PLA2G4A* |
| *PLAT* | *PLAU* | *PLG* | *PROC* | *PROS1* | *RBM8A* | *RUNX1* | *SERPINC1* | *SERPIND1* | *SERPINE1* |
| *TBXA2R* | *TBXAS1* | *THBD* | *THPO* | *TUBB1* | *VKORC1* | *VWF* | *WAS* |  |  |
